# Supplementary material for: Disruption of common ocular developmental pathways in patient-derived optic vesicle models of microphthalmia
Source: PubMed Central journal article supplement (PMC11390689; doi:10.1016/j.stemcr.2024.05.001), 2024-05-30
Supplement: mmc1.pdf [file mmc1.pdf]

**Stem Cell Reports, Volume 19**

**Supplemental Information**

**Disruption of common ocular developmental pathways in patient-derived optic vesicle models of microphthalmia**

**Jonathan Eintracht, Nicholas Owen, Philippa Harding, and Mariya Moosajee**

## Day 20

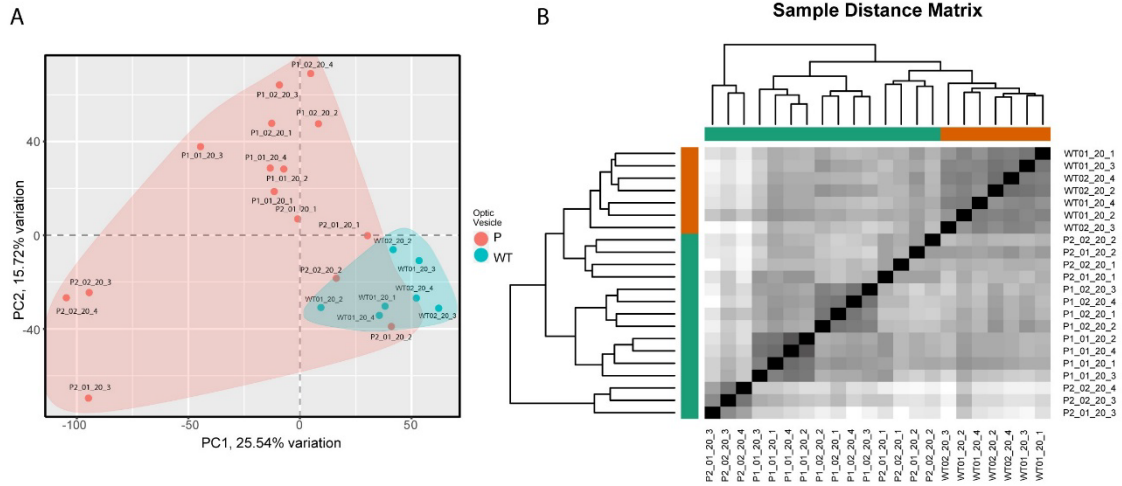

## Day 35

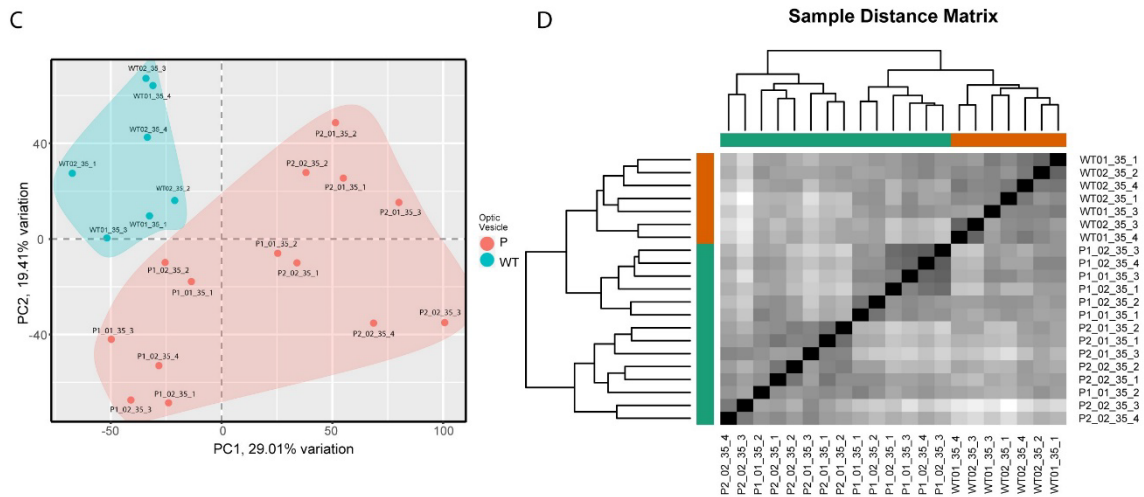

**Supplementary Figure 1: Principal Component Analysis (PCA) and Sample Distance Matrix (SDM) analysis of P v WT vesicles at day 20 and day 35. (a-b) PCA and SDM showing separation of both P1 and P2 samples from wild type controls at day 20. Duplicate clones from each patient and wild type iPSC line are represented as either clone 01 or clone 02. (c-d) PCA and SDM showing separation of both P1 and P2 samples from wild type controls at day 35. Duplicate clones from each patient and wild type iPSC line are represented as either clone 01 or clone 02.**

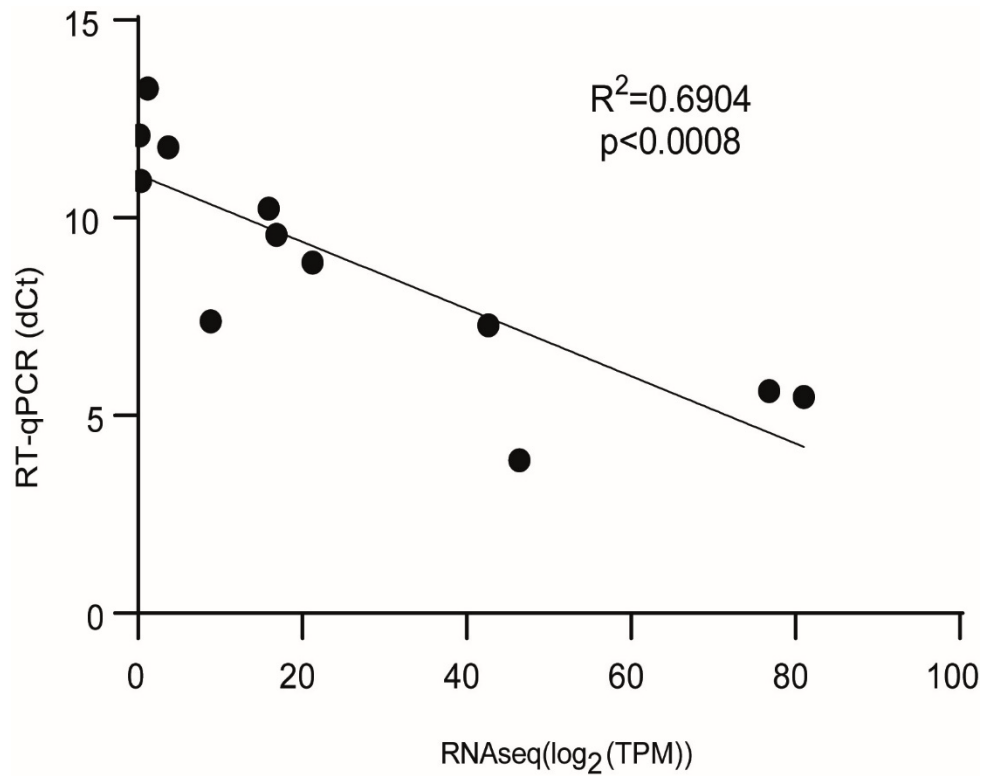

**Supplementary Figure 2: Validation of robust control RNA-seq data with TPM data correlating to RT-qPCR gene expression.** Scatterplot of optic vesicle sample RNA-seq normalised count data (TPM – transcripts per million) against normalised RT-qPCR  $\Delta C_t$  values for 6 key ocular development transcription factors (*VSX2*, *MITF*, *RAX*, *PAX6*, *SOX2*, *SIX6*) at day 20 and 35 of differentiation with significant correlation (Spearman correlation  $R^2=0.6904$ ,  $p$  value < 0.0008)

**Table S1: Clinically observed patient phenotypes**

|                                                    | <b>Ocular Phenotype</b>                                                                                                                                                                                                                                                                                                                                                                                                                                                                                                 | <b>Non-ocular phenotype</b>          |
|----------------------------------------------------|-------------------------------------------------------------------------------------------------------------------------------------------------------------------------------------------------------------------------------------------------------------------------------------------------------------------------------------------------------------------------------------------------------------------------------------------------------------------------------------------------------------------------|--------------------------------------|
| <b>Patient 1 (P1)</b><br><b>16 year old male</b>   | <ul style="list-style-type: none"><li>▪ Bilateral microphthalmia with axial length right eye 19.87 mm and left eye 20.03 mm</li><li>▪ Bilateral microcornea</li><li>▪ Bilateral iris and chorioretinal coloboma involving the macular and optic disc</li><li>▪ Best corrected visual acuity (BCVA) right eye no light perception and left eye 1.00 LogMAR.</li></ul>                                                                                                                                                    | N/A                                  |
| <b>Patient 2 (P2)</b><br><b>35 year old female</b> | <ul style="list-style-type: none"><li>▪ Unilateral left microphthalmia with axial length right eye 23.1 mm and left eye 20.5 mm</li><li>▪ Right eye exhibited a complex phenotype of partial iris hypoplasia, microcornea, aphakic (following cataract surgery) with chorioretinal coloboma involving the optic disc</li><li>▪ Left eye microphthalmia with microcornea, cataract, no posterior view</li><li>▪ Best corrected visual acuity (BCVA) right eye 1.00 LogMAR and left eye no perception to light.</li></ul> | Type II diabetes mellitus<br>Obesity |

**Table S6 – Primer Sequences**

| <b>Primer</b>                   | <b>Sequence (5'-3')</b>                                                | <b>Product size (bp)</b> |
|---------------------------------|------------------------------------------------------------------------|--------------------------|
| <i>OCT4</i><br>RT-qPCR          | F - CCCCAGGGCCCCATTTTGGTACC<br>R - ACCTCAGTTTGAATGCATGGGAGAGC          | 143                      |
| <i>SOX2</i><br>RT-qPCR          | F - TTCACATGTCCCA GCACTACCAGA<br>R - TCACATGTGTGAG AGGGGCAGTGTGC       | 80                       |
| <i>LIN28</i><br>RT-qPCR         | F - AGCCATATGGTAG CCTCATGTCCGC<br>R - TCAATTCTGTGCCT CCGGGAGCAGGG TAGG | 129                      |
| <i>c-MYC</i><br>RT-qPCR         | F - GCGAACCCAAGAC CCAGGCCTGCTCC<br>R - CAGGGGGTCTGCT CGCACCGTGATG      | 143                      |
| <i>GAPDH</i><br>RT-qPCR         | F - ACAGTTGCCATGT AGACC<br>R - TTTTGGTTGAGCA CAGG                      | 95                       |
| <i>OCT4</i> Plasmid<br>RT-qPCR  | F - CATTCAAAGTGA GTAAGGG<br>R - TAGCGTAAAAGGA GCAACATAG                | 124                      |
| <i>SOX2</i> Plasmid<br>RT-qPCR  | F - TTCACATGTCCCA GCACTACCAGA<br>R - TTTGTTTGACAGGA GCGACAAT           | 111                      |
| <i>c-MYC</i> Plasmid<br>RT-qPCR | F - GGCTGAGAAGAGG ATGGCTAC<br>R - TTTGTTTGACAGGA GCGACAAT              | 122                      |
| <i>LIN28</i> Plasmid<br>RT-qPCR | F - AGCCATATGGTAG CCTCATGTCCGC<br>R - TAGCGTAAAAGGA GCAACATAG          | 251                      |
| <i>KLF4</i> Plasmid RT-<br>qPCR | F - CCACCTCGCCTTA CACATGAAGA<br>R - TAGCGTAAAAGGA GCAACATAG            | 156                      |
| <i>EBNA</i> Plasmid<br>RT-qPCR  | F - ATCAGGGCCAAGA CATAGAGATG<br>R - GCCAATGCAACTT GGACGTT              | 61                       |
| <i>PAX6</i><br>RT-qPCR          | F - GGCCGAACAGACA CAGCCCTCAC<br>R - ATCATAACTCCGC CCATTACC             | 165                      |
| <i>OTX2</i><br>RT-qPCR          | F - TAAAAATTGCTAGA GCAGCC<br>R - CATGGGAGGTTAG AAAAAGTC                | 248                      |
| <i>RAX</i><br>RT-qPCR           | F - AGGCGGAAAAATA GAGTTTG<br>R - TACCCCAATATTCA CTCCTC                 | 139                      |
| <i>LHX2</i><br>RT-qPCR          | F - TTTTCTAATGACTC GCAACC<br>R - TTAGTTAGTTGCTC AAAGCC                 | 108                      |
| <i>VSX2</i><br>RT-qPCR          | F - GGCGACACAGGAC AATCTTTA<br>R - TTCCGGCAGCTCC GTTTTC                 | 122                      |
| <i>MITF</i><br>RT-qPCR          | F - CAGTACCTTTCTAC CACTTTAG<br>R - CCTCTTTTTACAG TTGGAG                | 163                      |
| <i>LUM</i><br>RT-qPCR           | F – AAGGATTCAAACCATTTGCC<br>R -TCAATTTAGCTCATCACAG                     | 199                      |

|                         |                                                      |     |
|-------------------------|------------------------------------------------------|-----|
| <i>NR2F1</i><br>RT-qPCR | F - CCGGCGTGAATTATCCCGTA<br>R - GCTCTTTTTGTTGTGCCGGT | 96  |
| <i>CASP8</i><br>RT-qPCR | F - CTACAGGGTCATGCTCTATC<br>R - ATTTGGAGATTTCTCTTGC  | 92  |
| <i>LHX5</i><br>RT-qPCR  | F - TTTCACCTCAACTGTTTCAC<br>R - TACAGGATGACACTGAGTTG | 157 |

**Table S7 – Primary and secondary antibodies**

| Primary Antibodies |         |                           |             |                 |                           |             |
|--------------------|---------|---------------------------|-------------|-----------------|---------------------------|-------------|
| Antibody           | Species | Supplier                  | Catalogue # | RRID            | Dilution                  | Application |
| OCT4               | Mouse   | Santa Cruz Biotechnology  | sc-5279     | AB_628051       | 1:100                     | IF          |
| SSEA3              | Rat     | Millipore                 | MAB4303     | AB_177628       | 1:50                      | IF          |
| AFP                | Mouse   | Santa Cruz Biotechnology  | sc-51506    | AB_626514       | 1:300                     | IF          |
| Vimentin           | Mouse   | Santa Cruz Biotechnology  | sc-6260     | AB_628437       | 1:250                     | IF          |
| PAX6               | Rabbit  | Covance                   | PRB-278P    | AB_291612       | 1:100                     | IF          |
| VSX2 (CHX10)       | Mouse   | Santa Cruz Biotechnology  | sc-365519   | AB_108424<br>42 | 1:200 (IF),<br>1:1000(WB) | IF/WB       |
| PH3                | Rabbit  | Cell Signaling Technology | 9701        | AB_154959<br>2  | 1:500                     | IF          |
| COL IV             | Rabbit  | Abcam                     | ab6586      | AB_305584       | 1:100 (IF),<br>1:1000(WB) | IF/WB       |
| LUM                | Rabbit  | Abcam                     | ab168348    | AB_292086<br>4  | 1:100 (IF),<br>1:1000(WB) | IF/WB       |
| NID2               | Rabbit  | Abcam                     | ab14513     | AB_301292       | 1:200 (IF),<br>1:1000(WB) | IF/WB       |
| β-actin            | Mouse   | Sigma-Aldrich             | A2228       | AB_476697       | 1:5000                    | WB          |

| Secondary Antibodies |                  |                          |             |            |          |
|----------------------|------------------|--------------------------|-------------|------------|----------|
| Antibody             | Species          | Supplier                 | Catalogue # | RRID       | Dilution |
| Alexa Fluor® 488     | Goat anti-Rat    | Thermo Fisher Scientific | A-11006     | AB_2534074 | 1:800    |
| Alexa Fluor® 488     | Goat anti-Rabbit | Thermo Fisher Scientific | A32731      | AB_2633280 | 1:800    |
| Alexa Fluor® 488     | Donkey anti-Goat | Thermo Fisher Scientific | A-11055     | AB_2534102 | 1:800    |

|                                                              |                      |                                |         |            |          |
|--------------------------------------------------------------|----------------------|--------------------------------|---------|------------|----------|
| Alexa Fluor®<br>647                                          | Donkey anti-<br>Goat | Thermo<br>Fisher<br>Scientific | A-21447 | AB_2535864 | 1:800    |
| Alexa Fluor®<br>647                                          | Goat anti-<br>Mouse  | Thermo<br>Fisher<br>Scientific | A-21235 | AB_2535804 | 1:800    |
| Polyclonal Goat<br>Anti-Mouse<br>Immunoglobulin<br>antibody  | Goat Anti-<br>Mouse  | Dako,<br>Denmark               | P0447   | AB_2617137 | 1:10 000 |
| Polyclonal Goat<br>Anti-Rabbit<br>Immunoglobulin<br>antibody | Goat Anti-<br>Rabbit | Dako,<br>Denmark               | P0448   | AB_2617138 | 1:10 000 |



## **Supplementary Experimental Procedures**

### ***hiPSC derivation and culture***

In brief, fibroblasts were derived from skin biopsies after overnight incubation and cultured  $1 \times 10^6$  fibroblast cells were electroporated (1600 V, 20ms, 3 pulses) with 1  $\mu$ g each of four episomal plasmids (pCXLE-hSK (Addgene ID# 27078), pCXLE-hUL (Addgene ID# 27080), pCXLE-hOCT3/4-shp53-F (Addgene ID# 27077) and pCXWB-EBNA1 (Addgene ID# 37624)) using the Neon Transfection System (Parfitt et al., 2016). Transfected cells were plated on 0.1% gelatin-coated 100 mm dishes in fibroblast media with 0.5 mM sodium butyrate (Sigma-Aldrich, cat#B5587). After seven days, cells were dissociated with TrypLE Express and 200,000 cells plated into each well of a Matrigel-coated (Corning, USA, cat#354377) 6-well plate in mTeSR Plus (STEMCELL Technologies, Canada, cat#1000276). Rudimentary iPSC colonies were excised from these plates and cultured in isolation. iPSCs were maintained in mTeSR Plus and passaged using ReleSR (STEMCELL Technologies, Canada, cat#05872). (Parfitt et al., 2016). Transfected cells were plated on 0.1% gelatin-coated 100 mm dishes in fibroblast media with 0.5 mM sodium butyrate (Sigma-Aldrich, cat#B5587). After seven days, cells were dissociated with TrypLE Express and 200,000 cells plated into each well of a Matrigel-coated (Corning, USA, cat#354377) 6-well plate in mTeSR Plus (STEMCELL Technologies, Canada, cat#1000276). Rudimentary iPSC colonies were excised from these plates and cultured in isolation. iPSCs were maintained in mTeSR Plus and passaged using ReleSR (STEMCELL Technologies, Canada, cat#05872).

### ***Embryoid body formation***

EBs were formed in Aggrewell™ plates, a plate where each well of a 24-well plate is comprised of 1200 microwells, as per manufacturer's instructions (STEMCELL Technologies, Canada, cat#34415). Briefly, iPSCs were washed with PBS and detached with Accumax (ThermoFisher Scientific, USA, cat#00-4666-56) to form a single cell suspension. After 5-8 minutes, mTeSR Plus media was added to each well. Cells were counted using Countess™ II Automated Cell Counter (ThermoFisher Scientific, USA).  $3.6 \times 10^6$  cells per well were centrifuged and resuspended in 1mL mTeSR Plus with 10 $\mu$ M Y-27632 and added to one well of the Aggrewell™ plate (3000 cells per microwell). Mixing with a pipette was required to ensure uniform distribution of cells. The plate was spun at 100g for three minutes and incubated at 37°C. After 24 hours, 1mL media was changed (day 1).

### ***Optic vesicle differentiation***

EBs were formed as previously described (Eintracht et al., 2022), and differentiation was performed as outlined (Mellough et al., 2015, Chichagova et al., 2019). 48 hours after EB formation (day 2), EBs were plated by gentle pipetting into 60mm TC-treated culture dishes (Appleton Woods, UK, cat#BF152) and cultured in Neural Induction Media (NIM), (DMEM/F12 (ThermoFisher Scientific, cat#31331028), 20% knock-out serum residue (KOSR) (ThermoFisher Scientific, cat#10828028, 2% B27

(ThermoFisher Scientific, USA, cat#17504001), 1xNon-Essential Amino Acids (NEAA; ThermoFisher Scientific, USA, cat#11140050), 1% P/S, 1xGlutamax (ThermoFisher Scientific, USA, cat#35050061) and 5ng/mL IGF-1 (Sigma-Aldrich, USA, cat#I3769). One well of an Aggrewell™ plate was transferred into six uncoated 60mm round dishes, resulting in a final density of approximately 200 EBs per 60mm culture dish, or 1200 EBs per  $3.6 \times 10^6$  cells.

Cells were cultured in NIM with decreasing KOSR concentrations, 20% from day 2-7, 15% from day 7-11 and 10% from day 11-18. From day 18, cells were cultured in Retinal Differentiation Media (DMEM/F12, 10% FBS, 2% B27, 1xNEAA, 1xGlutamax, 1% P/S, 5ng/mL IGF-1, 0.1mM taurine (Sigma-Aldrich, USA, cat#T8691), 40ng/mL triiodothyronine (Sigma-Aldrich, USA, cat#T6397) and 0.5 $\mu$ M retinoic acid (Sigma-Aldrich, USA, cat#R2625) added immediately before use. Cells were cultured in RDM until day 50. OV diameters were measured as described above.

#### ***Treatment with caspase-8 inhibitor Z-IETD-FMK***

To prepare for cell culture applications, 1mg of caspase-8 inhibitor Z-IETD-FMK was reconstituted in 150 $\mu$ L DMSO to a concentration of stock concentration of 10mM. This was diluted to a working concentration of 40 $\mu$ M in cell culture media based on previous in vitro experiments (Shi et al., 2018, Monari et al., 2008, Yuan et al., 2018). OVs were treated with 40 $\mu$ M Z-IETD-FMK on day 33 and day 34, beginning 48 hours prior to harvest on day 35. The total concentration of DMSO in culture did not exceed 0.2% to prevent cytotoxic effects.

#### ***Optic vesicle diameter measurements***

To measure OV diameters, the diameters of between 5-20 individual vesicles from brightfield images for each condition were measured using ImageJ (NIH, USA). Initially, diameters were measured in pixels using the ImageJ software by drawing a line across each vesicle and using the 'Measure' function. Lengths in pixels were converted to micrometres based on the manufacturers' data. For the 2x objective, the pixel size was 3.0854 $\mu$ m/pixel; for the 4x objective it was 1.5427 $\mu$ m/pixel and for the 10x objective it was 0.6172  $\mu$ m/pixel.

#### ***RNA isolation, RT-qPCR and RNA-seq analysis***

Each individual plate of OVs was collected at either day 0, day 20 or day 35 and RNA extraction was performed using the RNeasy Mini Kit (QIAGEN, Germany, cat#74104). cDNA was synthesized from 1 $\mu$ g using the SuperScript III First Strand cDNA synthesis kit (Invitrogen, USA, cat#18080093) according to manufacturer's instructions. RT-qPCR was performed using 2x SYBR Green Master Mix (ThermoFisher Scientific, USA, cat#4472908) as per manufacturer's instructions on the StepOne Real-Time PCR system (Applied Biosystems, ThermoFisher, UK). Primers used for the qRT-PCR at 200nM are listed below (**Table S6**) and were designed using the Primer-BLAST tool from the National Centre for Biotechnology Information. All transcript levels were measured in triplicate and normalised to

*GAPDH*, with undetermined  $C_t$  values in negative controls where no cDNA was present. The relative expression of each target gene compared to iPSCs at day 0 of differentiation was calculated using the comparative  $C_t$  or  $2^{-\Delta\Delta C_t}$  method (Schmittgen and Livak, 2008). Statistical comparisons and figures were generated using GraphPad Prism (GraphPad Software, USA). The relative expression of each target gene compared to iPSCs at day 0 of differentiation was calculated using the comparative  $C_t$  or  $2^{-\Delta\Delta C_t}$  method (Schmittgen and Livak, 2008). Statistical comparisons and figures were generated using GraphPad Prism (GraphPad Software, USA).

RNA-seq library construction was performed following the manufacturer's instructions using TruSeq stranded Total RNA with Ribo Zero Plus rRNA depletion (Illumina cat 20020599). Subsequent libraries were run on a bioanalyzer to verify size and concentration prior to sequencing on the NovaSeq 6000 platform at Novogen, UK. Raw sequence reads were assessed for quality issues and adapter sequences, or other sources of contamination using fastqc (<https://www.bioinformatics.babraham.ac.uk/projects/fastqc/>). Low quality sequences with PHRED quality scores below 6 were trimmed from reads using trim galore (v0.6.6, [https://www.bioinformatics.babraham.ac.uk/projects/trim\\_galore/](https://www.bioinformatics.babraham.ac.uk/projects/trim_galore/)). Reads passing these quality filters were aligned using HISAT2 (v2.2.1) to the Ensembl reference genome build GRCh38 and annotation version 102 (obtained Feb 2021) (Kim et al., 2019). Gene count tables were generated for all samples using featurecounts from the subread package (v2.0.0), and differential expression analysis carried out with DESeq2 v1.34 (Love et al., 2014). Genes with an absolute log<sub>2</sub> fold change of  $\geq 1$  and an FDR  $\leq 0.05$  were classified as differentially expressed. Further downstream analysis, including gene ontology (GO) over representation analysis, gene set enrichment analysis (GSEA), data visualisation and statistical tests were conducted using R for statistics v4.1.2. Initially P1 and 2 data were grouped for pairwise comparison with WT, subsequent analysis investigated all possible pairwise comparisons. Functional classifications of DEGs was analysed by GO ORA using gProfiler and by Gene Set Enrichment Analysis (GSEA) Bioconductor packages GAGE (Luo et al., 2009) and fgsea (Korotkevich et al., 2021) (Subramanian et al., 2005) using unfiltered ranked gene list. Molecular Signature Databases were obtained from MsigDB (v7.4), including pathways with curated gene sets from online pathway databases, biomedical literature and contributions from domain experts. This collection comprised of KEGG (<http://www.genome.jp/kegg/pathway.html>), Reactome (<http://www.reactome.org/>), Gene Ontologies (BP/MF/CC), Canonical Pathways, and WikiPathways.

### ***Western Blotting***

Samples were analysed by western blotting as previously described (Eintracht et al., 2021). Briefly, cells were washed with ice-cold PBS and total protein extract was prepared with RIPA buffer (ThermoFisher Scientific, MA, USA, cat#89900) at a ratio of  $5 \times 10^6$  cells/mL buffer and 1 x Halt™ protease and phosphatase inhibitor cocktail (ThermoFisher Scientific, MA, USA, cat#78440).

Proteins were resolved on 4–15% Mini-PROTEAN® TGX™ gels (Bio-Rad Inc., CA, USA, cat#4561025) and transferred to an Immun-Blot™ PVDF membrane using a Trans-Blot® SD semi-dry transfer cell (Bio-Rad Inc., CA, USA). Membranes were blocked with 5% non-fat dry milk in 0.1% PBS/T for 1 h. A complete list of primary and secondary antibodies and appropriate dilutions can be found in **Table S7**. Blots were scanned using the ChemiDoc XRS™ Imaging System (Bio-Rad Inc., CA, USA) and quantitatively analysed using the Fiji/ImageJ software (National Institutes of Health, MD, USA).

### ***Embedding and cryoembedding of vesicles***

OVs were fixed in 4% paraformaldehyde (Fisher Scientific, UK, cat# for 10-20 minutes at 4°C, washed three times with PBS and stored overnight at 4°C in 30% sucrose (Sigma-Aldrich, USA, cat#S0389). Vesicles were embedded individually in 1.5cm x 1.5cm x 0.5cm moulds (Fisher Scientific, UK, cat#11670990) containing 800µL 7.5% gelatin/10% sucrose (Sigma-Aldrich, USA cat#G2500) solution and left to solidify at 4°C overnight. Embedded vesicles were excised from their moulds and placed in OCT embedding media (Agar Scientific, UK, cat#AGR1180) prior to snap-freezing in -50°C 2-methylbutane using a small dewar in a fumehood (Sigma-Aldrich, USA, cat#M32631) for three minutes. Frozen blocks were stored at -80°C.

### ***Immunohistochemistry***

Vesicles were sectioned using the Leica CM 3050 S cryostat at a thickness of 10µm and slides were left at RT for 1-2 hrs. Slides were washed twice for five minutes in PBS+0.1%Tween®20 (PBS/T) (Sigma-Aldrich, USA, cat#P1379) and permeabilized in PBS/T+0.5% Triton-X (Fisher Scientific, UK, cat#10591461) for one hour at RT with slight agitation. Samples were washed with PBS/T for five minutes and then blocked for one hour at RT in PBS+0.2% gelatin+0.5% Triton-X. Samples were incubated with primary antibodies overnight at 4°C (primary antibodies and dilutions are listed below in **Table S7**). Samples were subsequently washed three times for ten minutes with PBS/T. Samples were then incubated with secondary antibodies for one hour at RT in the dark (secondary antibodies and dilutions are listed below in **Table S7**). Samples were washed again three times for five minutes with PBS/T and DAPI (Sigma Aldrich, UK, cat#D9542) and once for five minutes with PBS. Slides were dipped in 100% ethanol and left to dry at RT. Once dry, coverslips were mounted with ProLong™ Diamond Antifade Mountant (ThermoFisher Scientific, USA, cat#P36961) and left to set overnight at RT in the dark. Slides were imaged using the confocal microscopes ZEISS LSM 700 and LSM 710 (ZEISS Research, Germany) and figures were generated using ImageJ (NCBI, USA) and Adobe Illustrator (Adobe Inc, USA).

### ***TUNEL Assay***

Four or five OV's from each condition were fixed, cryoembedded and sectioned as described above. Apoptotic cell death was detected using the ApopTag Fluorescein *In Situ* Apoptosis Detection Kit (Merck Life Sciences, UK, cat#S7110) as per manufacturer's instructions. Sections were washed with DAPI and sealed with ProLong™ Diamond Antifade Mountant as described above. Slides were imaged as described above and stacked images collated on ImageJ (NCBI, USA). Levels of apoptotic cell death were quantified using the cell counter plugin on ImageJ (NCBI, USA).

### ***Caspase-8 Colorimetric Assay***

OV's from all conditions were collected and snap frozen at day 35. Protein was extracted and caspase-8 activity was measured using the Caspase-8 Colorimetric Assay Kit (R&D Systems, USA, cat#K113-100), as per manufacturer's conditions. Absorbance was measured using the EMax Plate Reader (Molecular Devices, USA). Data analysis was performed by Microsoft Excel (Microsoft, USA) and figures generated using GraphPad Prism (GraphPad Software, USA).

### ***References***

- CHICHAGOVA, V., DORGAU, B., FELEMBAN, M., GEORGIU, M., ARMSTRONG, L. & LAKO, M. 2019. Differentiation of Retinal Organoids from Human Pluripotent Stem Cells. *Current Protocols in Stem Cell Biology*, 50, e95.
- EINTRACHT, J., FORSYTHE, E., MAY-SIMERA, H. & MOOSAJEE, M. 2021. Translational readthrough of ciliopathy genes BBS2 and ALMS1 restores protein, ciliogenesis and function in patient fibroblasts. *EBioMedicine*, 70, 103515.
- EINTRACHT, J., HARDING, P., CUNHA, D. L. & MOOSAJEE, M. 2022. Efficient embryoid-based method to improve generation of optic vesicles from human induced pluripotent stem cells. *F1000Research*, 11, 324.
- KIM, D., PAGGI, J. M., PARK, C., BENNETT, C. & SALZBERG, S. L. 2019. Graph-based genome alignment and genotyping with HISAT2 and HISAT-genotype. *Nature biotechnology*, 37, 907-915.
- KOROTKEVICH, G., SUKHOV, V., BUDIN, N., SHPAK, B., ARTYOMOV, M. N. & SERGUSHICHEV, A. 2021. Fast gene set enrichment analysis. *BioRxiv*, 060012.
- LOVE, M. I., HUBER, W. & ANDERS, S. 2014. Moderated estimation of fold change and dispersion for RNA-seq data with DESeq2. *Genome biology*, 15, 1-21.
- LUO, W., FRIEDMAN, M. S., SHEDDEN, K., HANKENSON, K. D. & WOOLF, P. J. 2009. GAGE: generally applicable gene set enrichment for pathway analysis. *BMC bioinformatics*, 10, 1-17.
- MELLOUGH, C. B., COLLIN, J., KHAZIM, M., WHITE, K., SERNAGOR, E., STEEL, D. H. W. & LAKO, M. 2015. IGF-1 Signaling Plays an Important Role in the Formation of Three-Dimensional Laminated Neural Retina and Other Ocular Structures From Human Embryonic Stem Cells. *Stem Cells (Dayton, Ohio)*, 33, 2416-2430.
- MONARI, C., PAGANELLI, F., BISTONI, F., KOZEL, T. R. & VECCHIARELLI, A. 2008. Capsular polysaccharide induction of apoptosis by intrinsic and extrinsic mechanisms. *Cellular microbiology*, 10, 2129-2137.
- PARFITT, DAVID A., LANE, A., RAMSDEN, CONOR M., CARR, A.-JAYNE F., MUNRO, PETER M., JOVANOVIC, K., SCHWARZ, N., KANUGA, N., MUTHIAH, MANICKAM N., HULL, S., GALLO, J.-M., DA CRUZ, L., MOORE, ANTHONY T., HARDCASTLE, ALISON J., COFFEY, PETER J. &

- CHEETHAM, MICHAEL E. 2016. Identification and Correction of Mechanisms Underlying Inherited Blindness in Human iPSC-Derived Optic Cups. *Cell Stem Cell*, 18, 769-781.
- SCHMITTGEN, T. D. & LIVAK, K. J. 2008. Analyzing real-time PCR data by the comparative C T method. *Nature protocols*, 3, 1101.
- SHI, G., JIA, P., CHEN, H., BAO, L., FENG, F. & TANG, H. 2018. Necroptosis occurs in osteoblasts during tumor necrosis factor- $\alpha$  stimulation and caspase-8 inhibition. *Brazilian Journal of Medical and Biological Research*, 52.
- SUBRAMANIAN, A., TAMAYO, P., MOOTHA, V. K., MUKHERJEE, S., EBERT, B. L., GILLETTE, M. A., PAULOVICH, A., POMEROY, S. L., GOLUB, T. R. & LANDER, E. S. 2005. Gene set enrichment analysis: a knowledge-based approach for interpreting genome-wide expression profiles. *Proceedings of the National Academy of Sciences*, 102, 15545-15550.
- YUAN, Y., ZHANG, Y., ZHAO, S., CHEN, J., YANG, J., WANG, T., ZOU, H., WANG, Y., GU, J., LIU, X., BIAN, J. & LIU, Z. 2018. Cadmium-induced apoptosis in neuronal cells is mediated by Fas/FasL-mediated mitochondrial apoptotic signaling pathway. *Scientific Reports*, 8, 8837.
